# Supplementary material
Source: PubMed Central journal article supplement (PMC3985941)
Supplement: ja411998h_si_001.pdf [file ja411998h_si_001.pdf]

## Supporting Information for Publication

Extension and limits of the network of coupled motions correlated to hydride transfer in dihydrofolate reductase

Priyanka Singh<sup>1</sup>, Arundhuti Sen<sup>1,2</sup>, Kevin Francis<sup>1</sup> and Amnon Kohen<sup>1,\*</sup>

<sup>1</sup> The Department of Chemistry, The University of Iowa, Iowa City, IA 52242, U.S.A.

<sup>2</sup> Current Address: Institute of Pharmaceutical Science, King's College London, Franklin-Wilkins Building, 150 Stamford Street, London SE1 9NH, United Kingdom

\* To whom correspondence may be addressed. Professor Amnon Kohen, Department of Chemistry, The University of Iowa, Iowa City, IA 52242, U.S.A. Tel.: +1 319 335 0234; e-mail: [amnon-kohen@uiowa.edu](mailto:amnon-kohen@uiowa.edu)

## Figures

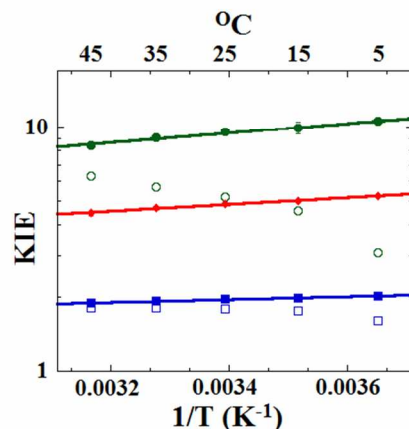

**Figure S1.** Arrhenius plot of observed (open structures) and intrinsic (closed structures) primary KIEs for F125M-ecDHFR. H/T KIEs are in green, H/D KIEs are in red and D/T KIEs are in blue. The solid lines represent a fit of the intrinsic KIEs to Arrhenius Equation.

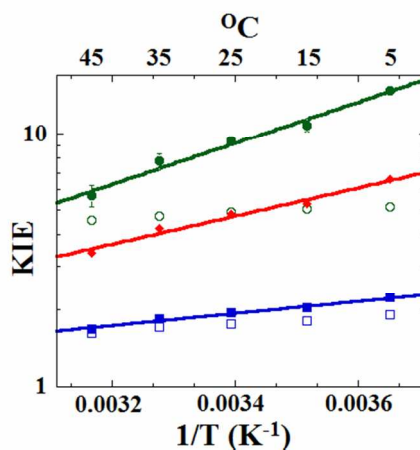

**Figure S2.** Arrhenius plot of observed (open structures) and intrinsic (closed structures) primary KIEs for M42W-F125M-ecDHFR. H/T KIEs are in green, H/D KIEs are in red and D/T KIEs are in blue. The solid lines represent a fit of the intrinsic KIEs to Arrhenius Equation.

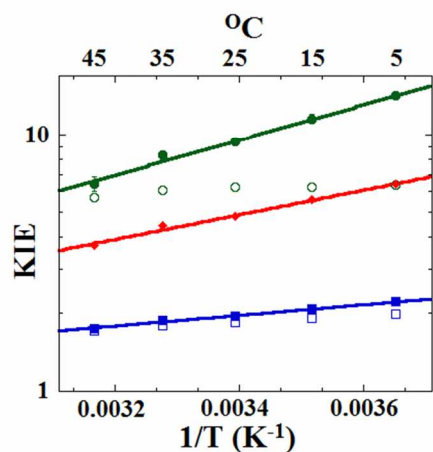

**Figure S3.** Arrhenius plot of observed (open structures) and intrinsic (closed structures) primary KIEs for G121V-F125M-*ecDHFR*. H/T KIEs are in green, H/D KIEs are in red and D/T KIEs are in blue. The solid lines represent a fit of the intrinsic KIEs to Arrhenius Equation.

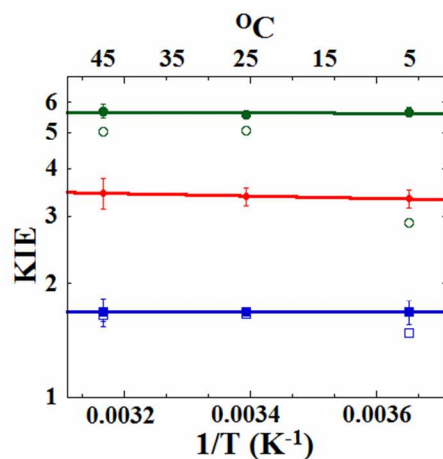

**Figure S4.** Arrhenius plot of observed (open structures) and intrinsic (closed structures) primary KIEs for W133F-*ecDHFR*. H/T KIEs are in green, H/D KIEs are in red and D/T KIEs are in blue. The solid lines represent a fit of the intrinsic KIEs to Arrhenius Equation.

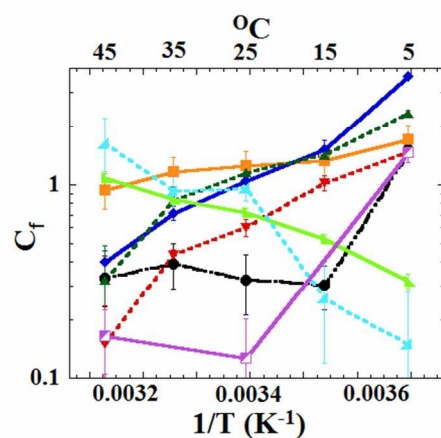

**Figure S5.** Comparison of the Arrhenius plots of the commitment to catalysis ( $C_f$  – Eq 4) on  $k_{cat}/K_M$  for H-transfer for the WT (black) and distal DHFR mutants: W133F (magenta), M42W (orange), G121V (light green), F125M (blue), M42W-F125M (green), G121V-F125M (red), M42W-G121V (light blue). Dashed line is used for WT, solid lines for single mutants and dotted lines for the double mutants, which accords with Figure 1 in the main text.

**Tables S1 – S4** summarize the observed and intrinsic primary H/T and D/T isotope effects and their standard deviations over a temperature range from 5 °C to 45 °C, measured for mutants of *ecDHFR* as described in ref.<sup>1</sup> The intrinsic KIEs were calculated from the observed KIEs and the errors were propagated as described in ref.<sup>1-5</sup>

**Table S1:** Observed and intrinsic *V/K* KIEs for F125M

| Temp.<br>°C | Observed<br>H/T KIE | Observed<br>D/T KIE | Intrinsic<br>H/T KIE | Intrinsic<br>H/D KIE | Intrinsic<br>D/T KIE |
|-------------|---------------------|---------------------|----------------------|----------------------|----------------------|
| 5           | 3.07 ± 0.02         | 1.61 ± 0.01         | 10.60 ± 0.28         | 5.23 ± 0.07          | 2.03 ± 0.05          |
| 15          | 4.55 ± 0.04         | 1.76 ± 0.01         | 9.97 ± 0.55          | 5.01 ± 0.03          | 1.99 ± 0.02          |
| 25          | 5.20 ± 0.09         | 1.80 ± 0.01         | 9.59 ± 0.30          | 4.87 ± 0.02          | 1.97 ± 0.02          |
| 35          | 5.71 ± 0.02         | 1.81 ± 0.02         | 9.06 ± 0.28          | 4.68 ± 0.09          | 1.93 ± 0.01          |
| 45          | 6.28 ± 0.03         | 1.82 ± 0.01         | 8.41 ± 0.28          | 4.44 ± 0.08          | 1.89 ± 0.02          |

**Table S2:** Observed and intrinsic *V/K* KIEs for M42W-F125M

| Temp.<br>°C | Observed<br>H/T KIE | Observed<br>D/T KIE | Intrinsic<br>H/T KIE | Intrinsic<br>H/D KIE | Intrinsic<br>D/T KIE |
|-------------|---------------------|---------------------|----------------------|----------------------|----------------------|
| 5           | 5.12 ± 0.01         | 1.91 ± 0.02         | 14.77 ± 0.34         | 6.60 ± 0.10          | 2.24 ± 0.02          |
| 15          | 5.06 ± 0.05         | 1.82 ± 0.02         | 10.81 ± 0.65         | 5.30 ± 0.04          | 2.04 ± 0.03          |
| 25          | 4.90 ± 0.02         | 1.77 ± 0.01         | 9.39 ± 0.22          | 4.80 ± 0.06          | 1.96 ± 0.01          |
| 35          | 4.72 ± 0.03         | 1.71 ± 0.01         | 7.83 ± 0.51          | 4.23 ± 0.02          | 1.85 ± 0.02          |
| 45          | 4.54 ± 0.03         | 1.62 ± 0.03         | 5.68 ± 0.57          | 3.38 ± 0.02          | 1.68 ± 0.06          |

**Table S3:** Observed and intrinsic  $V/K$  KIEs for G121V-F125M

| Temp.<br>°C | Observed    | Observed     | Intrinsic    | Intrinsic   | Intrinsic   |
|-------------|-------------|--------------|--------------|-------------|-------------|
|             | H/T KIE     | D/T KIE      | H/T KIE      | H/D KIE     | D/T KIE     |
| 5           | 6.33 ± 0.03 | 1.99 ± 0.01  | 14.26 ± 0.35 | 6.43 ± 0.03 | 2.22 ± 0.01 |
| 15          | 6.23 ± 0.04 | 1.92 ± 0.01  | 11.57 ± 0.49 | 5.58 ± 0.03 | 2.08 ± 0.02 |
| 25          | 6.22 ± 0.04 | 1.85 ± 0.01  | 9.36 ± 0.30  | 4.79 ± 0.03 | 1.95 ± 0.01 |
| 35          | 6.08 ± 0.04 | 1.80 ± 0.003 | 8.29 ± 0.13  | 4.41 ± 0.01 | 1.88 ± 0.01 |
| 45          | 5.71 ± 0.05 | 1.72 ± 0.03  | 6.42 ± 0.40  | 3.69 ± 0.02 | 1.75 ± 0.01 |

**Table S4:** Observed and intrinsic  $V/K$  KIEs for W133F

| Temp.<br>°C | Observed    | Observed    | Intrinsic   | Intrinsic   | Intrinsic   |
|-------------|-------------|-------------|-------------|-------------|-------------|
|             | H/T KIE     | D/T KIE     | H/T KIE     | H/D KIE     | D/T KIE     |
| 5           | 2.89 ± 0.05 | 1.48 ± 0.03 | 5.64 ± 0.17 | 3.34 ± 0.18 | 1.68 ± 0.13 |
| 25          | 5.04 ± 0.03 | 1.65 ± 0.02 | 5.56 ± 0.10 | 3.38 ± 0.18 | 1.68 ± 0.04 |
| 45          | 5.02 ± 0.07 | 1.65 ± 0.07 | 5.68 ± 0.23 | 3.46 ± 0.32 | 1.68 ± 0.14 |

## References

- (1) Wang, L.; Goodey, N. M.; Benkovic, S. J.; Kohen, A. *Proc. Natl. Acad. Sci. U.S.A.* **2006**, *103*, 15753-15758.
- (2) Stojković, V.; Perissinotti, L. L.; Willmer, D.; Benkovic, S. J.; Kohen, A. *J. Am. Chem. Soc.* **2012**, *134*, 1738-1745.
- (3) Stojković, V.; Perissinotti, L. L.; Lee, J.; Benkovic, S. J.; Kohen, A. *Chem. Commun.* **2010**, *46*, 8974-8976.

(4) Wang, L.; Tharp, S.; Selzer, T.; Benkovic, S. J.; Kohen, A. *Biochemistry* **2006**, *45*, 1383-1392.

(5) Wang, L.; Goodey, N. M.; Benkovic, S. J.; Kohen, A. *Philos. Trans. R. Soc. B* **2006**, *361*, 1307-1315.
